1 **TITLE:**

2 Leaf rolling as indicator of water stress in *Cistus incanus* from different provenances

3

4 **AUTHORS:**

5 Giacomo Puglielli; Loretta Gratani; Laura Varone

6

7 Department of Environmental Biology, Sapienza University of Rome, P.le A. Moro 5, 00185 Rome,  
8 Italy

9

10 **ABSTRACT:**

11 The relationship between leaf rolling and physiological traits under imposed water stress conditions  
12 was analyzed in *C. incanus* representative saplings collected at different altitudes (i.e.  
13 Castelporziano, 41°45'N, 12°26'E, 0 m a.s.l. and Natural Park of Monti Lucretili, 42°33'N, 12°54'E,  
14 750 m a.s.l) and grown *ex-situ*. The hypothesis that leaf rolling reflected physiological changes  
15 occurring during water stress irrespective to the different acclimation to cope with water stress was  
16 tested.

17 On the whole, the results show that leaf rolling is associated to an increased sub-stomatal CO<sub>2</sub>  
18 concentration ( $C_i$ ) and a decreased carboxylation efficiency ( $C_e$ ). Moreover, leaf rolling in *C.*  
19 *incanus* leaves might be involved in protecting the PSII complex under water stress during the  
20 progressive inhibition of photosynthetic metabolism.

21

22

23 **KEY WORDS:**

24 apparent carboxylation efficiency, electron transport rate, leaf rolling, photosynthesis, substomatal  
25 CO<sub>2</sub> concentration

26

27

28

29

30

31

32

33

34

## 35 **Introduction**

36 Leaf movements are common adaptive responses to stress factors in plants (Kadioglu et al. 2012).  
37 Leaf movement affects physiological performance because of the influence of orientation on leaf  
38 energy balance (Gamon and Pearcy 1989). Various reports (Ehleringer and Forseth 1980; Forseth  
39 and Ehleringer 1982; Gamon and Pearcy 1989; Mooney and Ehleringer 1978) show that  
40 diaheliotropism maximizes carbon gain by increasing incident photosynthetic photon flux density  
41 (PPFD) or minimizes incident radiation, resulting in more favorable leaf temperatures and water  
42 status during drought. Moreover, according to Ludlow and Björkman (1984) paraheliotropism  
43 contributes to avoid leaf photoinhibition under drought stress. Among leaf movements leaf rolling  
44 is an hydronastic mechanism involved in plant responses to stress factors (Kadioglu et al. 2012)  
45 such as water stress (Kadioglu et al. 2012). There is evidence (Heckathorn and De Lucia, 1991;  
46 Kadioglu and Terzi 2007; Kadioglu et al. 2012; Nar et al. 2009) that under water stress conditions  
47 leaf rolling affects stomatal conductance and consequently photosynthesis. Nevertheless, how it  
48 occurs is not clear yet. Abd Allah (2009) highlighted that leaf rolling reduces leaf surface exposed  
49 to sun light energy causing stomata closure and limiting CO<sub>2</sub> uptake. On the contrary, O'Toole and  
50 Cruz (1980) found that partial leaf rolling in leaves with adaxial stomata increased stomatal  
51 conductance by providing a more favorable microenvironment such as a higher relative humidity.  
52 However, the contribution of leaf rolling on stomatal conductance under water stress depends on  
53 several factors including stomatal distribution as well as the degree and pattern of stomatal opening  
54 at low leaf water potential (Heckathorn and DeLucia 1991).

55 In Mediterranean ecosystems, the distribution of the dominant growth form and habitus is related to  
56 water availability. According to a gradient of increasing aridity, there is a decrease in the transpiring  
57 surfaces up to the complete lack of leaves in drought deciduous shrubs, associated with drought-  
58 evading annual species (De Micco and Aronne 2009). An intermediate form between evergreen and  
59 drought deciduous species is represented by seasonally dimorphic species. Unlike drought  
60 deciduous plants, in seasonally dimorphic species the decrease in transpiring surfaces during the  
61 drought period is not complete.

62 In particular, to cope with drought stress these species develop twigs with short internodes  
63 (brachyblasts) characterized by small xeromorphic leaves in summer, and twigs with longer  
64 internodes (dolichoblasts) with larger mesomorphic leaves in winter (De Micco and Aronne 2009).  
65 Seasonal leaf dimorphism has been reported to be an adaptive strategy to the seasonal climatic  
66 changes occurring in Mediterranean habitats (Aronne and De Micco, 2001; Christodoulakis et al.  
67 1990; Kyparissis et al., 1997; Orshan 1964). Moreover, in seasonal dimorphic Mediterranean

68 species leaf rolling has been described as a mechanism to reduce light interception (Aronne and De  
69 Micco 2001; Gratani and Bombelli 1999).

70 Seasonal dimorphic *Cistus* sp. are known to avoid photochemistry drought induced impairment by  
71 leaf movements such as variation in leaf angle (Flexas et al. 2014; Werner et al. 1999, 2001) and  
72 leaf rolling. Among these species *Cistus incanus* L. is a typical Mediterranean shrub species  
73 distributed along the coastal belt of the Central-Eastern Mediterranean, Northern Africa and  
74 Western Asia, extending from sea level to 800 m a.s.l. (Pignatti 1982).

75 The aim of this research was to analyze the relationship between leaf rolling and physiological  
76 variables in two populations of *Cistus incanus* growing at the altitudinal limits of its distribution  
77 area and being subjected to different selective pressures. In particular, the population growing at the  
78 highest altitude faces lower chilling temperatures during winter and a higher amount of  
79 precipitation during the year associated to a reduced extent of summer drought. On the contrary, the  
80 coastal population faces a reduced amount of precipitation during the year associated to a prolonged  
81 summer drought. The hypothesis that leaf rolling reflected physiological changes occurring during  
82 water stress irrespective to the different acclimation to cope with water stress was tested.

83

## 84 **Materials and methods**

### 85 **Study site and plant material**

86 The study was carried out in July 2014 at the experimental garden of Sapienza University of Rome  
87 (41°54'N, 12°31'E; 41 m a.s.l.). Three-year old saplings of *C. incanus* grown from seeds collected  
88 in June 2012 in the Mediterranean maquis developing along the *Latium* coast near Rome  
89 (Castelporziano, 41°45'N, 12°26'E, 0 m a.s.l.) and at the Natural Park of Monti Lucretili (42°33'N,  
90 12°54'E, 750 m a.s.l.) were considered. Saplings (twenty saplings per provenance) were cultivated  
91 in plastic pots (32 cm diameter and 29 cm depth) containing silt (5-8 %), clay (16-39 %) and sand  
92 (56-75%) (pH 7.2 – 7.5) and grown inside a growth chamber under constant photosynthetically  
93 active radiation (PPFD) of 600  $\mu\text{mol m}^{-2} \text{s}^{-1}$  (12 h), at 25/20 °C light/dark average temperature and  
94 50/40% relative air humidity.

95 The provenance sites are characterized by a Mediterranean climate (Fig. 1). In particular, at  
96 Castelporziano the mean minimum air temperature ( $T_{\text{min}}$ ) of the coldest months (January and  
97 February) is  $4.8 \pm 2.3^\circ\text{C}$ , the mean maximum air temperature ( $T_{\text{max}}$ ) of the hottest months (July and  
98 August) is  $30.5 \pm 1.8^\circ\text{C}$ , and the yearly mean air temperature ( $T_{\text{mean}}$ ) is  $16.4 \pm 6.1^\circ\text{C}$ . The dry period  
99 is from mid-May to August (48.3 mm of total rainfall in this period). Total annual rainfall equals  
100 824 mm with the greatest part occurring in autumn and in winter (data from Meteorological Station  
101 of Roma Capocotta, SIARL, Arsial, for the period 2004–2013).

102 At the Natural Park of Monti Lucretili the mean minimum air temperature ( $T_{\min}$ ) of the coldest  
103 months (January and February) is  $0.5 \pm 1.6^{\circ}\text{C}$ , the mean maximum air temperature ( $T_{\max}$ ) of the  
104 hottest months (July and August) is  $32.7 \pm 1.6^{\circ}\text{C}$ , and the yearly mean air temperature ( $T_{\text{mean}}$ ) is  
105  $14.3 \pm 6.7^{\circ}\text{C}$ . The dry period is from mid-June to August (63.9 mm of total rainfall in this period).  
106 Total annual rainfall equals 1077 mm with the greatest part occurring in autumn and in winter (data  
107 from Meteorological Station of Palombara Sabina, SIARL, Arsial, for the period 2004–2013).

108

## 109 **Experimental procedure**

110 Until the onset of the experiment (on July 5<sup>th</sup>), twenty saplings from Castelporziano and from Monti  
111 Lucretili (CP and LC saplings, respectively) were watered regularly to field capacity. Gas exchange,  
112 leaf water status, chlorophyll fluorescence and leaf rolling index measurements for the control  
113 saplings were performed on the first day of the experiment when all the saplings were well watered.  
114 Thereafter, the water stress was imposed by withholding water from ten CP and ten LC saplings,  
115 randomly arranged (stressed saplings, CPs and LCs, for Castelporziano and Monti Lucretili,  
116 respectively). In each sampling day the measurements were carried out on six randomly selected  
117 saplings per provenance.

118 The remaining ten saplings per provenance were kept under daily irrigation and measured to verify  
119 that the considered parameters maintained constant values through the experiment. The water stress  
120 experiment was stopped when stomatal conductance in CPs and LCs was below  $0.05 \text{ mol m}^{-2} \text{ s}^{-1}$   
121 indicative of a severe water stress condition (Medrano et al. 2002). On the whole the experiment  
122 lasted four days. Thereafter, the experimental days are indicated as D1 (first experimental day), D2  
123 (two days after the beginning of the experiment) and D3 (four days after the beginning of the  
124 experiment).

125

## 126 **Gas exchange**

127 During the experiment, maximum net  $\text{CO}_2$  assimilation rate ( $A_{\max}$ ,  $\mu\text{mol CO}_2 \text{ m}^{-2} \text{ s}^{-1}$ ), stomatal  
128 conductance ( $g_s$ ,  $\text{mol H}_2\text{O m}^{-2} \text{ s}^{-1}$ ), leaf transpiration ( $E$ ,  $\text{mmol H}_2\text{O m}^{-2} \text{ s}^{-1}$ ) and substomatal  $\text{CO}_2$   
129 concentration ( $C_i$ , ppm) were measured with an open infrared gas analyser system (LCpro+, ADC,  
130 UK), equipped with a leaf chamber (PLC, ADC, UK).

131 Measurements were carried out while the natural inclination of the leaves was maintained. Between  
132 each measurement the IRGA was calibrated for  $\text{CO}_2$  and water vapor following the instructions of  
133 the manufacturers.

134 Six measurements on young fully expanded sun leaves per each selected control and stressed  
135 sapling were carried out every two days in the morning (11.00–12.30 h) at saturating PPFD (1500

136  $\mu\text{mol photon m}^{-2} \text{ s}^{-1}$ ) provided by the light source (LCpro+ Lamp unit). Before each measurement,  
137 the leaves were acclimated to saturated light conditions (*c.* 15-20 min).  $\text{CO}_2$  concentration in the  
138 leaf chamber ( $C_a$ ) was set at  $400 \mu\text{mol CO}_2 \text{ mol}^{-1}\text{air}$ , and relative air humidity of the incoming air  
139 ranged between 40% and 60%. Leaf temperature ( $T_l$ , °C) was set at 25°C and varied by 1% during  
140 measurements. Apparent carboxylation efficiency ( $C_e$ ) was also determined by the ratio between  
141  $A_{\text{max}}$  and  $C_i$  (Flexas et al. 2001).

142

### 143 **Chlorophyll fluorescence**

144 Measurements of chlorophyll fluorescence were carried out on the same leaves of gas exchange  
145 measurements, using a portable modulated fluorometer (OS5p, Opti-Sciences, USA).

146 Chlorophyll fluorescence measurements were carried out at saturating PPFD (i.e.  $1500 \mu\text{mol photon}$   
147  $\text{m}^{-2} \text{ s}^{-1}$ ) ensuring a uniform light distribution on leaf surface while maintaining an inclination of the  
148 fluorometer pulse source at 45°.

149 The actual quantum efficiency of the photosystem II ( $\Phi_{\text{PSII}}$ ) was calculated according to Genty et al.  
150 (1989) as:

151

$$152 \quad \Phi_{\text{PSII}} = (F_m' - F_s) / F_m',$$

153

154 where  $F_m'$  was the maximum fluorescence obtained with a saturating pulse (*c.*  $8,000 \mu\text{mol m}^{-2} \text{ s}^{-1}$   
155 PPFD) and  $F_s$  was the steady-state fluorescence of illuminated leaves ( $1,500 \mu\text{mol m}^{-2} \text{ s}^{-1}$  PPFD).

156 The rate of electron transport rate (ETR) was calculated, according to Krall and Edwards (1992) as:

157

$$158 \quad \text{ETR} = (\Phi_{\text{PSII}}) \times \text{PPFD} \times 0.5 \times 0.84.$$

159

160

### 161 **Leaf water status**

162 Leaf water potential ( $\Psi_{\text{leaf}}$ , MPa) was measured in control and stressed plants by a pressure bomb  
163 (SKPM 1400, Sky Instruments, Powys, UK).

164 The samples were enclosed in a bag previously saturated with  $\text{CO}_2$  and water vapor in order to  
165 avoid water losses from stomata.

166 Measurements were carried out in each sampling occasion on four leaves per each of the considered  
167 sapling after gas exchange measurements. In addition, relative water content (RWC, %) was  
168 measured as:

169

170 
$$\text{RWC} = [(\text{FW} - \text{DW}) / (\text{TW} - \text{DW})] \times 100$$

171

172 where FW was the leaf fresh weight, DW was the leaf dry weight after drying at 80 °C until  
173 constant weight was reached, and TW was the leaf weight after re-hydration until saturation for 48h  
174 at 5 °C in the darkness.

175

### 176 **Leaf rolling index**

177 Leaf rolling index (LRI, %) was calculated on the same leaves used for gas exchange measurements  
178 according to Li et al. (2010) as:

179

180 
$$\text{LRI} = [(L_w - L_n) / L_w] \times 100$$

181

182 where  $L_w$  was the maximum leaf blade width and  $L_n$  the natural distance of the leaf blade margins.  
183 For LRI measurements  $L_w$  was measured only at D1 in order to avoid any confounding effect of leaf  
184 manipulation on gas exchange and chlorophyll fluorescence measurements.

185

### 186 **Statistical analysis**

187 One-way ANOVA was performed to evaluate the differences between CPs and LCs and between  
188 stressed and control saplings at  $p \leq 0.05$ . Multiple comparisons were analyzed by a Tukey test.

189 Regression analysis was used to explore the relationships among the considered variables.

190 Relationships were considered significant at  $p \leq 0.01$ .

191 Kolmogorov–Smirnov and Levene tests were used to verify the assumptions of normality and  
192 homogeneity of variances, respectively. All data are shown as mean  $\pm$  standard deviation (s.d.).

193 All the statistic tests were performed by a statistical software package (Statistica.8, Stasoft, USA).

194

## 195 **Results**

### 196 **Gas exchange**

197 The daily gas exchange measurements are shown in and Figure 2.

198 During the experiment the highest  $A_{\text{max}}$  values were measured at D1 for both CPs ( $18.6 \pm 2.6 \mu\text{mol}$   
199  $\text{CO}_2 \text{ m}^{-2} \text{ s}^{-1}$ ) and LCs ( $10.5 \pm 2.6 \mu\text{mol CO}_2 \text{ m}^{-2} \text{ s}^{-1}$ ).  $A_{\text{max}}$  decreased by 32% and 83%, at D2 and D3,

200 respectively in CPs, and by 23% and 88%, respectively, in LCs (Fig. 2A).  $g_s$  showed the same  $A_{\max}$   
201 trend dropping below  $0.05 \text{ mol H}_2\text{O m}^{-2} \text{ s}^{-1}$  at D3 for both CPs and LCs (Fig. 2B).

202 In CPs saplings  $C_i$  was  $260 \pm 9.8$  ppm at D1 decreasing by 6% at D2 and increasing by 9% at D3  
203 compared to D1.  $C_i$  increased during the experiment by 11% and 41% at D2 and D3, respectively,  
204 compared to D1 ( $224 \pm 22$  ppm).  $C_e$  did not vary between D1 and D2 in CPs ( $0.04 \pm 0.01$ ) while it  
205 decreased by 75% at D3. In LCs,  $C_e$  decreased by 50% and 92%, at D2 and D3, respectively,  
206 compared to D1 ( $0.04 \pm 0.01$ ) (Fig. 2D).

207 The control plants did not show any significant variation in gas exchange parameters during the  
208 experiment both in CPc and LCc.

209

### 210 **Chlorophyll fluorescence**

211 The ETR and  $\Phi_{\text{PSII}}$  values measured during the experiment are shown in Fig. 3.

212 In particular, in CPs ETR decreased by 14% and 30% at D2 and D3, respectively, compared to D1  
213 ( $221.9 \pm 20.2 \mu\text{mol e}^- \text{ m}^{-2} \text{ s}^{-1}$ ) (Fig. 3A).  $\Phi_{\text{PSII}}$  showed the same ETR trend with the highest value at  
214 D1 ( $0.38 \pm 0.05$ ) decreasing by 8% and 37% at D2 and D3, respectively (Fig. 3B).

215 In LCs saplings ETR and  $\Phi_{\text{PSII}}$  through the experiment did not vary significantly between the  
216 experimental days (Fig. 3A, B).

217

### 218 **Leaf water status**

219 The measured values of RWC and  $\Psi_{\text{leaf}}$  are shown in Table 1.

220 CPs and LCs showed a significant decrease (by 113% and 133%) in  $\Psi_{\text{leaf}}$  compared to D1 ( $-$   
221  $1.50 \pm 0.2$  and  $-1.50 \pm 0.02$  MPa for CPc and LCc, respectively). RWC was 100% at D1 in both  
222 control and stressed saplings decreasing by 75% in both CPs and LCs at D3. Control plants did not  
223 show any significant variation of RWC and  $\Psi_{\text{leaf}}$  during the experiment.

224

### 225 **Leaf rolling index**

226 At D1 both CPs and LCs did not show any symptom of rolling. At D2, LRI did not increase in CPs  
227 while it slightly and significantly increased by 2% in LCs. LRI increased by 7% and 28% in CPs  
228 and LCs, respectively, at D3.

229 Control saplings did not show any symptom of rolling during the experiment (Table 2).

230 LRI showed a linear relationship ( $p < 0.01$ ) with  $C_i$  ( $R^2=0.62$  and  $R^2=0.73$ , for CPs and LCs,  
231 respectively) and  $g_s$  ( $R^2= -0.62$  and  $R^2= -0.73$ , for CPs and LCs, respectively). LRI was also  
232 significantly related with  $C_e$  in both CPs and LCs ( $R^2= -0.76$  and  $R^2= -0.81$ , respectively) while it  
233 is significantly correlated with ETR only in CPs ( $R^2= -0.41$ ).



## 234 Discussion

235 The results highlight a different response of CPs and LCs to water stress, which reflects their  
236 different provenances. In fact, LCs saplings, which experience a shorter period of drought in their  
237 natural environment in respect to CP saplings, are characterized by a higher sensitivity to water  
238 stress highlighted by a faster metabolic impairment.

239 In particular, both CPs and LCs showed the lowest values of  $\Psi_{\text{leaf}}$  ( $-3.2 \pm 0.03$  and  $-3.5 \pm 0.05$  MPa,  
240 respectively) at D3 reaching a RWC value of  $75.5 \pm 0.7\%$ . When expressed as percentage of the  
241 control,  $A_{\text{max}}$ ,  $g_s$  and  $E$  trends were similar in CPs and LCs. Nevertheless, ETR and  $C_e$  were the  
242 parameters that showed the greatest differences between CPs and LCs.

243 According to Lawlor and Cornic (2002), the decrease in RWC increases  $C_i$ . However, in CPs,  $C_i$   
244 decreases at D2 (6%) and increased by 9% at D3, compared to D1. In LCs  $C_i$  increases through the  
245 experiment. In response to stomatal closure,  $\text{CO}_2$  inside the leaf initially declines then it increases as  
246 drought become more severe (Lawlor 1995). The decrease in  $C_i$  at D2 for CPs plants suggest that  
247 stomatal limitations dominate under moderate water stress, irrespective of any metabolic  
248 impairment (Flexas and Medrano 2002). However, at a certain stage of water stress  $C_i$  frequently  
249 increases highlighting the predominance of non-stomatal limitations of photosynthesis. Usually, the  
250 point at which  $C_i$  starts to increase occurs around  $g_s$  values of  $0.05 \text{ mol H}_2\text{O m}^{-2} \text{ s}^{-1}$  (Flexas and  
251 Medrano 2002). Accordingly, CPs show the highest value of  $C_i$  at D3 when  $g_s$  was  $0.03 \text{ mol H}_2\text{O m}^{-2} \text{ s}^{-1}$ .  
252 On the contrary, LCs show the occurrence of non-stomatal limitations in D2 when  $g_s$  was  $0.07$   
253  $\text{mol H}_2\text{O m}^{-2} \text{ s}^{-1}$ . The results are confirmed by the different  $C_e$  trend in CPs and LCs. In fact, CPs  
254 show  $C_e$  values equal to 100% of the control until D2, decreasing by 25% of the control at D3,  
255 while in LCs  $C_e$  decreases by 50% and 7.5% of the control at D2 and D3, respectively.

256 A RWC higher than 75% has not effect on photosynthetic metabolism (Lawlor and Cornic 2002).  
257 Nevertheless, the results of the experiment highlight a faster progressive inhibition of metabolism in  
258 LCs, associated to a higher RWC (i.e. 80%), than in CPs.

259 Water stress exposes plants to photo-inhibition by reducing PSII efficiency and ETR (Cabrera  
260 2002). During the experiment both ETR and  $\Phi_{\text{PSII}}$  decrease in CPs showing the lowest values at D3,  
261 while in LCs they do not vary significantly compared to the control. In particular, the ETR and  $\Phi_{\text{PSII}}$   
262 decrease in CPs at D2 may be interpreted as a down-regulation mechanism at lower  $A_{\text{max}}$  (Biehler  
263 and Fock 1996; Cornic and Massacci 1996; Haupt-Herting and Fock, 2000, 2002). Since the rate of  
264 electron transport at saturating photon flux is determined by sink capacity for electrons (such as  
265 photosynthesis at high RWC), a decreased sink capacity for electrons results in an increased non-  
266 photochemical energy dissipation (Lawlor and Cornic 2002). This may be justified by  $\Phi_{\text{PSII}}$   
267 reduction observed in CPs while the ETR decrease at D3 may be the result of non-stomatal



268 limitations. On the contrary, the lack of variation in ETR and  $\Phi_{PSII}$  in LCs suggests that the redox  
269 system under water stress is in a reduced state due to continued electron transport and absence of  
270 sinks (Lawlor and Cornic 2002), as confirmed by the significant decrease in  $C_e$  through the  
271 experiment. Moreover, the constant ETR and the  $C_i$  increase in LCs during the experiment could be  
272 also due to an increased photorespiration rate. In fact, decreasing RWC has long been known to  
273 increase the ratio of photorespiration to photosynthesis (Lawlor 1976; Lawlor and Fock 1975).  
274 Nevertheless, fluorescence and  $O_2$  isotope analysis showed that despite in stressed leaves the  
275 photorespiration to photosynthesis ratio increases, the absolute photorespiration rate was not so  
276 large like in unstressed leaves, so fewer electrons may be used (Biehler and Fock 1996).  
277 During the experiment LCs show leaf rolling (i.e. LRI =  $2\pm 1\%$ ) at D2 increasing to  $28\pm 14\%$  at D3,  
278 while in CPs leaf rolling (LRI =  $7\pm 3\%$ ) appears at D3. Since leaf rolling is a hydronastic  
279 mechanism the delayed leaf rolling in CPs indicates the ability to better sustain turgor, despite water  
280 stress, compared to LCs according to Kadioglu et al. (2012).  
281 Moreover, LRI shows a significant ( $p < 0.01$ ) linear relationship with  $C_i$  ( $R^2=0.62$  and  $R^2=0.73$ , for  
282 CPs and LCs, respectively) and  $g_s$  ( $R^2= -0.62$  and  $R^2= -0.73$ , for CPs and LCs, respectively),  
283 suggesting that LRI reflects the leaf physiological changing which occur during water stress. LRI is  
284 also significantly related with  $C_e$  in both CPs and LCs ( $R^2= -0.76$  and  $R^2= -0.81$ , respectively)  
285 while it is significantly correlated with ETR only in CPs ( $R^2= -0.41$ ). The lack or the weakness of  
286 the relationship between LRI and ETR, associated to a strong negative relationships between LRI  
287 and  $C_e$  in both CPs and LCs, suggests that LRI is involved in protecting PSII under drought  
288 condition (Nar et al. 2009) during the progressive inhibition of photosynthetic metabolism.  
289 In conclusion, the results highlighted that leaf rolling is related to the physiological variables in both  
290 CPs and LCs despite their different response to water stress. Thus, leaf rolling in seasonal  
291 dimorphic Mediterranean species may be used as morphological index not only to monitor the  
292 water status in the field but also to evaluate the progressive inhibition of photosynthetic metabolism  
293 irrespective to the different acclimation to cope with water stress.

294

## 295 **References**

- 296 Abd Allah AA (2009) Genetic studies on leaf rolling and some root traits under drought conditions  
297 in rice (*Oryza sativa* L.). Afr J Biotechnol 8: 6241–6248
- 298 Aronne G, De Micco V (2001) Seasonal dimorphism in the Mediterranean *Cistus incanus* L. subsp.  
299 *incanus*. Ann Bot (Lond) 87: 789–794

- 300 Biehler K, Fock H (1996) Evidence for the contribution of the Mehler-peroxidase reaction in  
301 dissipating excess electrons in drought-stressed wheat. *Plant Physiol* 112: 265–272
- 302 Cabrera HM (2002) Ecophysiological responses of plants in ecosystems with Mediterranean-like  
303 climate and high mountain environments. *Rev Chil Hist Nat* 75: 625 – 637
- 304 Christodoulakis NS, Tsimbani H, Fasseas C (1990) Leaf structural peculiarities in *Sarcopoterium*  
305 *spinosum*, a seasonally dimorphic subshrub. *Ann Bot (Lond)* 65: 291–296
- 306 Cornic G, Massacci A (1996) Leaf photosynthesis under drought stress. In: Baker NR (ed)  
307 *Photosynthesis and the Environment*. Kluwer Academic Publishers, Dordrecht, pp 347–366
- 308 De Micco V, Aronne G (2009) Seasonal dimorphism in wood anatomy of the Mediterranean *Cistus*  
309 *incanus* L. subsp. *incanus*. *Trees-Struct Funct* 23: 981– 989
- 310 Ehleringer JR, Forseth I (1980) Solar tracking by plants. *Science* 210: 1094–1098
- 311 Flexas J, Medrano H (2002) Drought-inhibition of photosynthesis in C3 plants: stomatal and non-  
312 stomatal limitations revisited. *Ann Bot (Lond)* 89: 183–189
- 313 Flexas J, Barón M, Bota J, Ducruet J, Gallé A, Galmés J, Jiménez M, Pou A, Ribas-Carbó M,  
314 Sajnani C, Tomàs M, Medrano H (2009) Photosynthesis limitations during water stress acclimation  
315 and recovery in the drought-adapted *Vitis* hybrid Richter-110 (*V. berlandieri* X *V. rupestris*). *J Exp*  
316 *Bot* 60: 2361–2377
- 317 Flexas J, Gulías J, Jonasson S, Medrano H, Mus M (2001) Seasonal patterns and control of gas  
318 exchange in local populations of the Mediterranean evergreen shrub *Pistacia lentiscus* L. *Acta*  
319 *Oecol* 22: 33–43
- 320 Flexas J, Diaz-Espejo A, Gago J, Gallé A, Galmés J, Gulías J, Medrano H (2014) Photosynthetic  
321 limitations in Mediterranean plants: A review. *Environ Exp Bot* 103: 12–23
- 322 Forseth IN, Ehleringer JR (1982) Ecophysiology of two solar tracking desert winter annuals. II.  
323 Leaf movements, water relations and microclimate. *Oecologia* 54: 41–49
- 324 Gamon JA, Pearcy RW (1989) Leaf movement, stress avoidance and photosynthesis in *Vitis*  
325 *californica*. *Oecologia*: 79: 475–481

- 326 Genty B, Briantais JM, Baker NR (1989) The relationship between the quantum yield of  
327 photosynthetic electron transport and quenching of chlorophyll fluorescence, *Biochim Biophys*  
328 *Acta* 990: 87–92
- 329 Grassi G, Magnani F (2005) Stomatal, mesophyll conductance and biochemical limitations to  
330 photosynthesis as affected by drought and leaf ontogeny in ash and oak trees. *Plant Cell Environ* 28:  
331 834–849
- 332 Gratani L, Bombelli A (1999) Leaf anatomy, inclination, and gas exchange relationships in  
333 evergreen sclerophyllous and drought semideciduous shrub species. *Photosynthetica* 37: 573–585
- 334 Haupt-Herting S, Fock HP (2000) Exchange of oxygen and its role in energy dissipation during  
335 drought stress in tomato plants. *Physiol Plantarum* 110: 489–495
- 336 Haupt-Herting S, Fock HP (2002) Oxygen exchange in relation to carbon assimilation in drought  
337 stressed leaves during photosynthesis. *Ann Bot (Lond)* 89: 851– 859
- 338 Heckathorn SA, Delucia EH (1991) Effect of leaf rolling on gas exchange and leaf temperature of  
339 *Andropogon gerardii* and *Spartina pectinate*. *Bot Gaz* 152: 263–268
- 340 Kadioglu A, Terzi R (2007) A dehydration avoidance mechanism: leaf rolling. *Bot Rev* 73: 290–  
341 302
- 342 Kadioglu A, Terzi R, Saruhanb N, Saglama A (2012) Current advances in the investigation of leaf  
343 rolling caused by biotic and abiotic stress factors. *Plant Sci* 182: 42–48
- 344 Krall JP, Edwards GE (1992) Relationship between photosystem II activity and CO<sub>2</sub> fixation in  
345 leaves. *Physiol Plantarum* 86: 180–187.
- 346 Kyparissis A, Manetas Y (1993) Seasonal leaf dimorphism in a semi-deciduous Mediterranean  
347 shrub: ecophysiological comparisons between winter and summer leaves. *Acta Oecol-Oec Plant* 14:  
348 23–32
- 349 Kyparissis A, Grammatikopoulos G, Manetas Y (1997) Leaf demography and photosynthesis as  
350 affected by the environment in the drought semi-deciduous Mediterranean shrub *Phlomis fruticosa*  
351 L. *Acta Oecol-Oec Plant* 18: 543–555
- 352 Lawlor DW (1995) The effects of water deficit on photosynthesis. In: Smirnov N (ed)  
353 *Environment and Plant Metabolism*. Bios Scientific Publishers, Oxford, pp 129–160

- 354 Lawlor DW (1976) Water stress induced changes in photosynthesis, photorespiration, respiration  
355 and CO<sub>2</sub> compensation concentration of wheat. *Photosynthetica* 10: 378–387
- 356 Lawlor DW, Cornic G (2002) Photosynthetic carbon assimilation and associated metabolism in  
357 relation to water deficits in higher plants. *Plant Cell Environ* 25: 275–294
- 358 Lawlor DW, Fock H (1977) Photosynthetic assimilation of <sup>14</sup>CO<sub>2</sub> by water-stressed sunflower  
359 leaves in two oxygen concentrations and the specific activity of products. *J Exp Bot* 28: 320–328
- 360 Ludlow MM, Björkman O (1984) Paraheliotropic leaf movement in *Siratro* as a protective  
361 mechanism against drought-induced damage to primary photosynthetic reactions: damage by  
362 excessive light and heat. *Planta* 161: 505–518
- 363 Medrano H, Escalona JM, Bota J, Gulías J, Flexas J (2002). Regulation of photosynthesis of C3  
364 plants in response to progressive drought: stomatal conductance as a reference parameter. *Ann Bot*  
365 (Lond) 89: 895–905
- 366 Mooney HA, Ehleringer JR (1978) The carbon gain benefits of solar tracking in a desert annual.  
367 *Plant Cell Environ* 1: 307–311
- 368 Nar H, Saglam A, Terzi R, Varkonyi Z, Kadioglu A (2009) Leaf rolling and photosystem II  
369 efficiency in *Ctenanthe setosa* exposed to drought stress. *Photosynthetica* 47: 429–436
- 370 O’Toole JC, Cruz RT (1980) Response of leaf water potential, stomatal-resistance, and leaf rolling  
371 to water-stress. *Plant Physiol* 65: 428–432
- 372 Orshan G. (1964) Seasonal dimorphism of desert and Mediterranean chamaephytes and its  
373 significance as a factor in their water economy. In: Rutter AJ, Whitehead FH (eds.) *The Water*  
374 *Relations of Plants*. Blackwell, Edinburgh, pp 206–222
- 375 Pignatti S (1982) *Flora d’Italia*. Edagricole, Bologna
- 376 Werner C, Correia O, Beyschlag W (1999) Two different strategies of Mediterranean macchia  
377 plants to avoid photoinhibitory damage by excessive radiation levels during summer drought. *Acta*  
378 *Oecol* 20: 15–23
- 379 Werner C, Ryel RJ, Correia O, Beyschlag W (2001) Effects of photoinhibition on whole-plant  
380 carbon gain assessed with a photosynthesis model. *Plant Cell Environ* 24: 27–40

381

| $\Psi_{\text{leaf}}$ (Mpa) |                |                |                |                |
|----------------------------|----------------|----------------|----------------|----------------|
|                            | CPs            | CPc            | LCs            | LCc            |
| <b>D1</b>                  | -1.50±0.2 a,A  | -1.54±0.03 a,A | -1.50±0.02 a,A | -1.48±0.01 a,A |
| <b>D2</b>                  | -1.90±0.1 b,A  | -1.53±0.03 a,B | -2.10±0.01 b,A | -1.52±0.01 a,B |
| <b>D3</b>                  | -3.20±0.03 c,A | -1.52±0.02 a,B | -3.50±0.07 c,A | -1.54±0.02 a,B |

  

| RWC (%)   |             |              |             |              |
|-----------|-------------|--------------|-------------|--------------|
|           | CPs         | CPc          | LCs         | LCc          |
| <b>D1</b> | 98±0.02 a,A | 100±0.01 a,A | 99±0.02 a,A | 99±0.008 a,A |
| <b>D2</b> | 84±0.01 b,A | 98±0.02 a,B  | 82±0.03 b,A | 99±0.002 a,B |
| <b>D3</b> | 75±0.07 c,A | 98±0.02 a,B  | 76±0.06 c,A | 98±0.009 a,B |

382 **Table 1.** Leaf water potential ( $\Psi_{\text{leaf}}$ ) and relative water content (RWC) measured during the  
383 first experimental day (D1), two days after the beginning of the experiment (D2) and four  
384 days after the beginning of the experiment (D3). CPs = stressed saplings of *Cistus incanus*  
385 from Castelporziano, CPc = control saplings of *Cistus incanus* from Castelporziano, LCs =  
386 stressed saplings of *Cistus incanus* from Natural Park of Monti Lucretili LCc = control  
387 saplings of *Cistus incanus* from Natural Park of Monti Lucretili. Mean values ( $\pm$  SE) are  
388 shown (n = 24). Lowercase letters show significant differences between experimental days,  
389 capital letters show significant differences between control and stressed saplings at p =  
390 0.05.

391  
392  
393  
394  
395  
396  
397  
398  
399  
400  
401

| LRI (%)   |      |     |        |     |
|-----------|------|-----|--------|-----|
|           | CPs  | CPc | LCs    | LCc |
| <b>D1</b> | 0    | 0   | 0      | 0   |
| <b>D2</b> | 0    | 0   | 2±1    | 0   |
| <b>D3</b> | 7±3a | 0   | 28±14b | 0   |

**Table 2.** Leaf rolling index (LRI) measured during the first experimental day (D1), two days after the beginning of the experiment (D2) and four days after the beginning of the experiment (D3). CPs = stressed saplings of *Cistus incanus* from Castelporziano, CPc = control saplings of *Cistus incanus* from Castelporziano, LCs = stressed saplings of *Cistus incanus* from Natural Park of Monti Lucretili, LCc = control saplings of *Cistus incanus* from Natural Park of Monti Lucretili. Mean values ( $\pm$  SE) are shown (n = 24). Lowercase letters show significant differences between CPs and LCs saplings at p = 0.05.

402  
403  
404  
405  
406  
407  
408  
409  
410  
411  
412  
413  
414  
415  
416  
417  
418  
419  
420  
421  
422  
423  
424  
425  
426  
427  
428

429 **Figure legends**

430 **Fig. 1.** Bagnouls-Gausсен's diagram (Time series 2004-2013) for A: Castelporziano 41°45'N,  
431 12°26'E, 0 m a.s.l., and for B: the Natural Park of Monti Lucretili (42°33'N, 12°54'E, 750 m a.s.l.).

432

433 **Fig. 2.** Trends of A: maximum net CO<sub>2</sub> assimilation rate ( $A_{max}$ ), B: stomatal conductance ( $g_s$ ), C:  
434 leaf transpiration ( $E$ ), and D: carboxylation efficiency ( $C_e$ ) measured during the first experimental  
435 day (D1), two days after the beginning of the experiment (D2) and four days after the beginning of  
436 the experiment (D3) of stressed *Cistus incanus* saplings from Castelporziano (CPs, black line) and  
437 from the Natural Park of Monti Lucretili (LCs, gray line). Mean values ( $\pm$  SE) are shown ( $n = 36$ ).  
438 Lowercase letters show significant differences between experimental days, capital letters show  
439 significant differences between CPs and LCs saplings at  $p = 0.05$ .

440

441 **Fig. 3.** Trends of: A: rate of electron transport (ETR), and B: the actual quantum efficiency of the  
442 photosystem II ( $\Phi_{PSII}$ ) measured during the first experimental day (D1), two days after the  
443 beginning of the experiment (D2) and four days after the beginning of the experiment (D3) of  
444 stressed *Cistus incanus* saplings from Castelporziano (CPs, black line) and from the Natural Park of  
445 Monti Lucretili (LCs, gray line). Mean values ( $\pm$  SE) are shown ( $n = 36$ ). Lowercase letters show  
446 significant differences between experimental days, capital letters show significant differences  
447 between CPs and LCs saplings at  $p = 0.05$ .

448

449 **Fig. 4.** Relationships between leaf rolling index (LRI) and substomatal CO<sub>2</sub> concentration ( $C_i$ ),  
450 stomatal conductance ( $g_s$ ), carboxylation efficiency ( $C_e$ ) and rate of electron transport (ETR) of  
451 stressed *Cistus incanus* saplings from Castelporziano (CPs, black dots, left column) and from the  
452 Natural Park of Monti Lucretili (LCs, gray dots, right column). Daily mean values per sapling were  
453 used as experimental units ( $n = 18, p \leq 0.01$ ).

454

455

456

457

458

459

460



461 **Fig. 1**

462

463

464

465

466

467

468

469

470

471

472

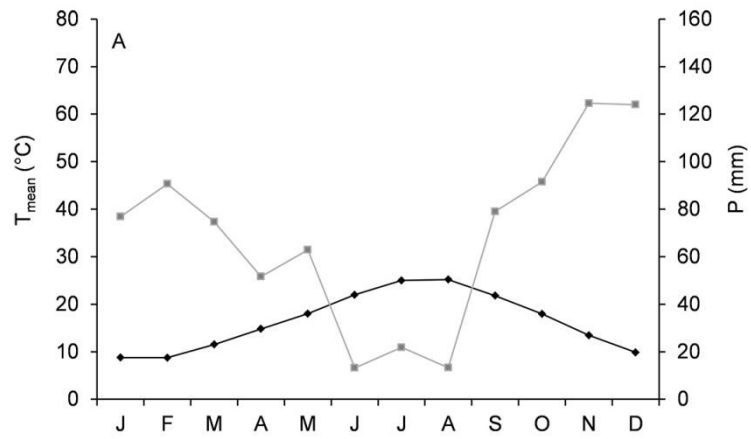

473

474

475

476

477

478

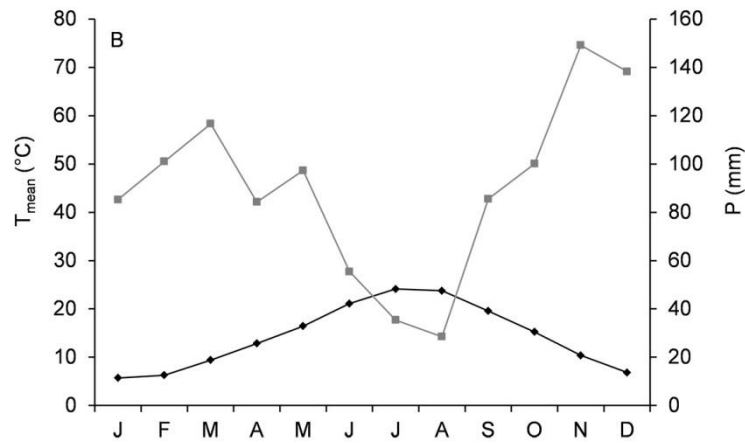

479

480

481

482

483

484

485 **Fig. 2.**

486

487

488

489

490

491

492

493

494

495

496

497

498

499

500

501

502

503

504

505

506

507

508

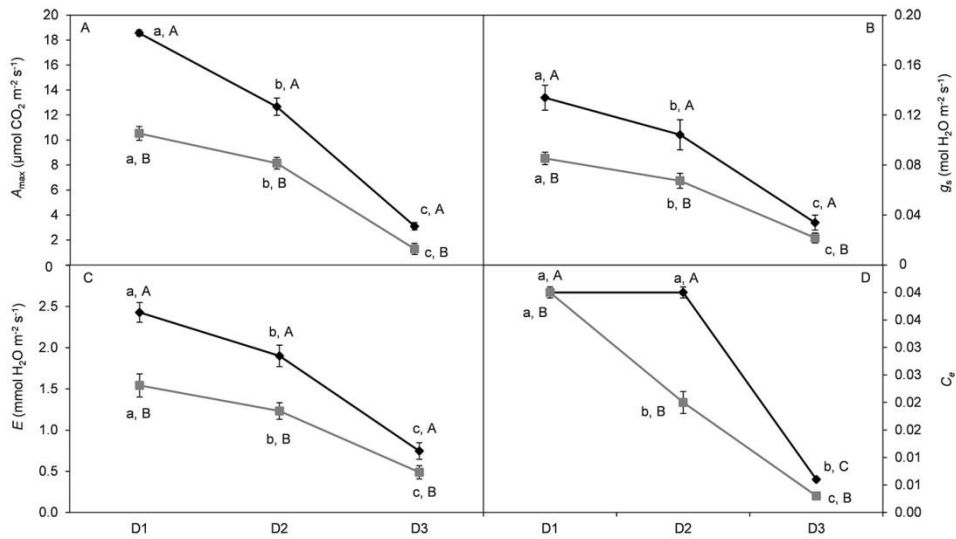

509 **Fig. 3.**

510

511

512

513

514

515

516

517

518

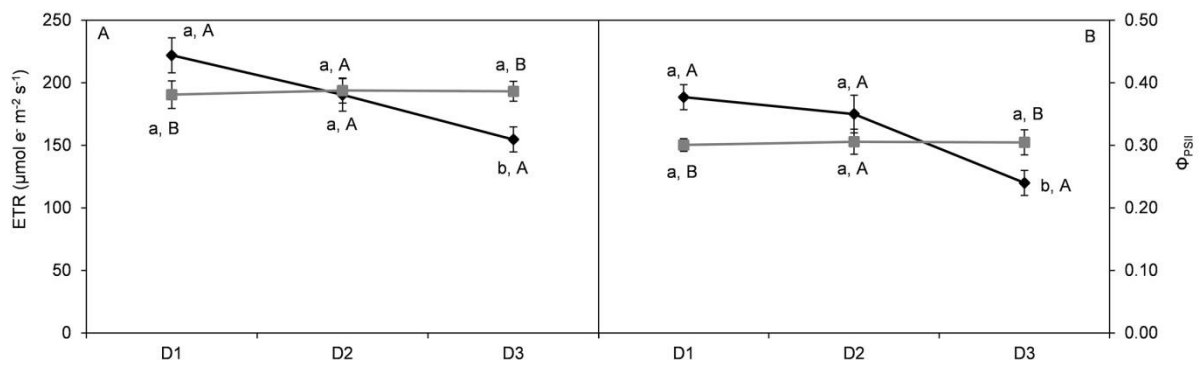

519

520

521

522

523

524

525

526

527

528

529

530 **Fig. 4.**

531

532

533

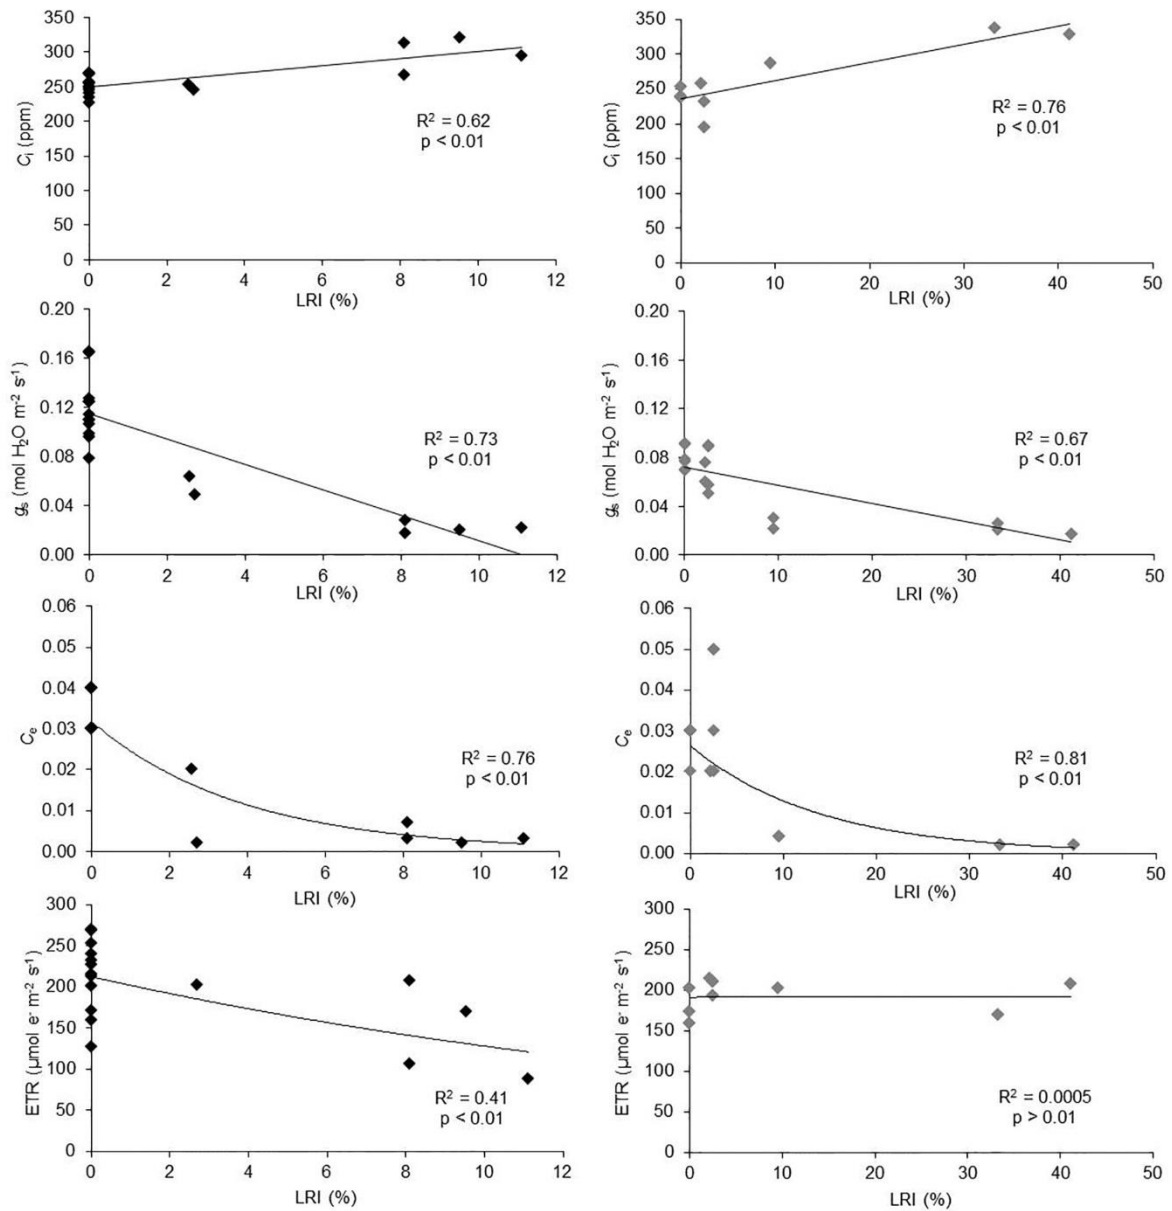

534

535
